# Supplementary material for: Nickel nanoparticles supported on reduced graphene oxide sheets: a phosphine free, magnetically recoverable and cost effective catalyst for Sonogashira cross-coupling reactions
Source: Royal Society of Chemistry journal article supplement (doi:10.1039/c5ra22601e), 2015-01-01

## Supporting information

### **Nickel nanoparticles supported reduced graphene oxide sheets: A phosphine free, magnetically recoverable and cost effective catalyst for Sonogashira cross-coupling reaction**

*Najrul Hussain<sup>ac</sup>, Pranjal Gogoi<sup>bc\*</sup>, Puja Khare<sup>d</sup> and Manash R. Das<sup>ac\*</sup>*

<sup>a</sup>Materials Science Division, CSIR-North East Institute of Science and Technology, Jorhat-785006, Assam, India.

<sup>b</sup>Medicinal Chemistry Division, CSIR-North East Institute of Science and Technology, Jorhat-785006, Assam, India.

<sup>c</sup>Academy of Scientific and Innovative Research, CSIR, India

<sup>d</sup>Agronomy & Soil Science Division, CSIR-Central Institute of Medicinal and Aromatic Plants, Near Kukrail Picnic Spot, Lucknow-226015, Lucknow India

## List of the Contents

1. **General procedure of Sonogashira coupling reaction.....S2**
2. **Analytical data.....S2**
3. **Some copies of <sup>1</sup>H & <sup>13</sup>C spectra.....S6**

**General procedure for the Sonogashira cross-coupling reaction:**

A mixture of aryl halide (1 mmol), phenyl acetylene (1.5 mmol),  $K_2CO_3$  (3 mmol) and CuI (0.08 mmol) was taken in round bottom flask. A suspension of Ni NPs-rGO (25 mg, 0.15 mmol Ni) N-methyl-2-pyrrolidone (5 mL) was added to it. The whole reaction mixture was stirred at 120 °C for 4 h. After completion of the reaction (monitored by TLC), the catalyst was separated from the reaction mixture by using an external magnet and the reaction mixture was poured into water. The organic product was recovered by extracting with ethyl acetate (3x10 mL). Then the organic phase were dried over  $Na_2SO_4$  and concentrated in vacuum. The products were purified by column chromatography using silica gel (60-120 mesh) with EtOAc/hexanes as eluent to obtain the desired Sonogashira cross-coupling product.

**Analytical data:****Biphenylacetylene, 3a:** <sup>1</sup>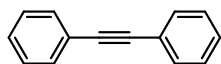

[White solid; mp 58-61°C; Yield = 95% (107 mg);  $R_f$  = 0.66 (Hexane)];  $^1H$  NMR (500 MHz,  $CDCl_3$ ):  $\delta$  7.51-7.54 (m, 4H), 7.32-7.34 (m, 6H);  $^{13}C$  NMR (125 MHz,  $CDCl_3$ ):  $\delta$  131.5, 128.3, 128.2, 123.2, 89.3; IR ( $CHCl_3$ ): 3308, 2914, 1214, 742, 670  $cm^{-1}$ .

**1-methyl-4-(phenylethynyl)benzene, 3b:** <sup>2</sup>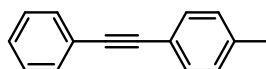

[Light yellow solid; mp 68-71°C; Yield = 94% (146 mg);  $R_f$  = 0.62 (Hexane)];  $^1H$  NMR (500 MHz,  $CDCl_3$ ):  $\delta$  7.49-7.52 (m, 2H), 7.41 (d,  $J$  = 7.5 Hz, 2H), 7.29-7.32 (m, 3H), 7.11 (d,  $J$  = 7.5 Hz, 2H), 2.34 (s, 3H);  $^{13}C$  NMR (125 MHz,  $CDCl_3$ ):  $\delta$  138.3, 131.54, 129.1, 128.2, 128.0, 123.4, 120.1, 89.5, 88.6, 21.4. IR ( $CHCl_3$ ): 2922, 2199, 1600, 1511, 747, 484  $cm^{-1}$ .

**1-nitro-4-(phenylethynyl)benzene, 3c:** <sup>2,3</sup>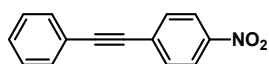

[Light yellow solid; mp 108-110 °C; Yield = 93% (102 mg);  $R_f$  = 0.65 (10% EtOAc in hexanes)];  $^1\text{H}$  NMR (500 MHz,  $\text{CDCl}_3$ ):  $\delta$  8.22 (d,  $J$  = 9 Hz, 2H), 7.65-7.68 (m, 2H), 7.55-7.57(m, 2H), 7.38-7.41 (m, 3H) ;  $^{13}\text{C}$  NMR (125 MHz,  $\text{CDCl}_3$ ):  $\delta$  147.2, 132.3, 131.8, 130.3, 129.3, 128.5, 123.6, 122.1, 94.7, 87.5; IR ( $\text{CHCl}_3$ ): 3305, 2930, 2197, 1502.16, 855, 759, 513  $\text{cm}^{-1}$

**1-(phenylethynyl)naphthalene, 3d:** <sup>1</sup>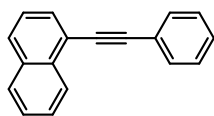

[Light yellow colour liquid; Yield = 93% (102 mg);  $R_f$  = 0.42 (Hexane)];  $^1\text{H}$  NMR (500 MHz,  $\text{CDCl}_3$ ):  $\delta$  8.43-8.45 (m, 1H), 7.75-7.87 (m, 3H), 7.23-7.69 (m, 8H);  $^{13}\text{C}$  NMR (125 MHz,  $\text{CDCl}_3$ ):  $\delta$  133.1, 131.6, 130.3, 128.7, 128.3, 128.3, 128.2, 126.7, 126.3, 126.1, 125.2, 120.8, 94.2, 87.4; IR ( $\text{CHCl}_3$ ): 3111, 2012, 1251.21, 744, 544, 519  $\text{cm}^{-1}$

**1-methyl-4-((4-nitrophenyl)ethynyl)benzene, 3e:** <sup>6</sup>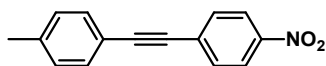

[yellow solid; mp = 120-122 °C; yield = 88 % (102 mg);  $R_f$  = 0.58 (10% EtOAc in hexanes)];  $^1\text{H}$  NMR (500 MHz,  $\text{CDCl}_3$ ):  $\delta$  8.21 (d,  $J$  = 9 Hz, 2H), 7.65 (d,  $J$  = 9 Hz, 2H), 7.45 (d,  $J$  = 8 Hz, 2H), 7.19 (d,  $J$  = 8 Hz, 2H), 2.39(s, 3H;  $^{13}\text{C}$  NMR (125 MHz,  $\text{CDCl}_3$ ):  $\delta$  139.5, 132.0, 132.2, 131.65, 129.2, 123.0, 118.1, 94.9, 87.2, 21.4 ; IR ( $\text{CHCl}_3$ ): 3158, 2943, 2029, 152, 814, 540  $\text{cm}^{-1}$

**1-chloro-4-(phenylethynyl)benzene, 3f:** <sup>4</sup>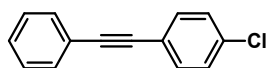

[White solid; mp 83-84 °C; Yield = 91% (101 mg)]; <sup>1</sup>H NMR (500 MHz, CDCl<sub>3</sub>): δ 7.50-7.58 (m, 2H), 7.46 (d, *J* = 8.3, 2H) 7.31-7.39 (m, 5H) ; <sup>13</sup>C NMR (125 MHz, CDCl<sub>3</sub>): δ 134.2, 132.7, 131.5, 128.6, 128.4, 128.2, 122.9, 121.7, 90.2, 88.2; IR (CHCl<sub>3</sub>): 3494, 2310, 1464, 810, 499 cm<sup>-1</sup>

**1-methyl-3-(phenylethynyl)benzene, 3g:** <sup>5</sup>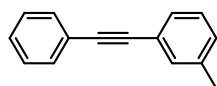

[White solid; mp 69-70 °C; Yield = 93% (105 mg); R<sub>f</sub> = 0.68 (Hexane)]; <sup>1</sup>H NMR (500 MHz, CDCl<sub>3</sub>): δ 7.50-7.53 (m, 2H), 7.30-7.40 (m, 5H), 7.21 (d, *J* = 7.5 Hz, 1H), 7.12 (d, *J* = 7 Hz, 1H), 2.33 (s, 3H); <sup>13</sup>C NMR (125 MHz, CDCl<sub>3</sub>): δ 138.0, 132.2, 131.6, 129.1, 128.7, 128.3, 128.2, 128.1, 123.3, 123.0, 89.5, 89.0, 21.2; IR (CHCl<sub>3</sub>): 3312, 2925, 2132, 1483, 892, 591 cm<sup>-1</sup>.

**1-methyl-3-(p-tolylethynyl)benzene, 3h:** <sup>5</sup>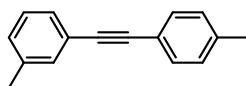

[Pale yellow solid; mp = 81-84 °C; Yield = 93% (112 mg); R<sub>f</sub> = 0.54 (Hexane)]; <sup>1</sup>H NMR (500 MHz, CDCl<sub>3</sub>): δ = 7.42(d, *J* = 8.5 Hz, 2H), 7.32 (d, *J* = 7.5 Hz, 2H), 7.10-7.24 (m, 4H), 2.35(s, 3H), 2.34 (s, 3H); <sup>13</sup>C NMR (125 MHz, CDCl<sub>3</sub>): δ 139, 138.1, 132.2, 131.4, 129.1, 129.0, 128.9, 128.5, 123.1, 120.2, 89.1, 88.8, 21.5, 21.4.; IR (CHCl<sub>3</sub>): 3309, 2926, 2121, 1484, 800, 516 cm<sup>-1</sup>

**2-(phenylethynyl)pyridine, 3i:**<sup>5</sup>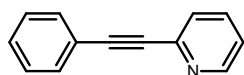

[yellow solid; mp = 39 °C; Yield = 86% (145 mg);  $R_f$  = 0.25 (10% EtOAc in hexanes);  $^1\text{H}$  NMR (500 MHz,  $\text{CDCl}_3$ ):  $\delta$  = 8.62-8.63(m, 1H), 7.66-7.71 (m, 5H), 7.36-7.61(m, 3H);  $^{13}\text{C}$  NMR (125 MHz,  $\text{CDCl}_3$ ):  $\delta$  150.0, 143.5, 136.1, 132.0, 128.9, 128.4, 127.2, 122.7, 122.3, 89.3, 88.6; IR ( $\text{CHCl}_3$ ): 3387, 2154, 1423, 795, 648  $\text{cm}^{-1}$

**2,5-bis(2-phenylethynyl)pyridine, 3j:**<sup>7</sup>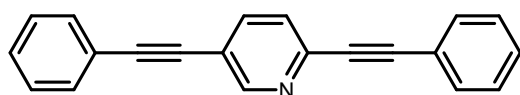

[Brown solid; mp = 168-170 °C; Yield = 91% (252 mg);  $R_f$  = 0.29 (10% EtOAc in hexanes);  $^1\text{H}$  NMR (500 MHz,  $\text{CDCl}_3$ ):  $\delta$  = 8.76(m, 1H), 7.73-7.85 (m, 1H), 7.58-7.63(m, 2H), 7.52-7.57 (m, 2H), 7.48-7.50 (m, 1H), 7.32-7.42 (m, 6H) ;  $^{13}\text{C}$  NMR (125 MHz,  $\text{CDCl}_3$ ):  $\delta$  152.3, 141.8, 138.3, 132.0, 131.6, 129.1, 128.9, 128.4, 128.3, 126.3, 122.3, 122.0, 119.3, 94.2, 91.2, 88.4, 85.9; IR ( $\text{CHCl}_3$ ): 3403, 2193, 1500, 2121, 1498, 760, 512  $\text{cm}^{-1}$

**References:**

1. M. Shunmughanathan, P. Puthiaraj and K. Pitchumani, *ChemCatChem*, 2015, **7**, 666-673.
2. F. Farjadian and B. Tamami, *ChemPlusChem*, 2014, **79**, 1767 – 1773.
3. M. Barbero, S. Cadamuro and S. Dughera, *Eur.J.Org.Chem.*, 2014, **2014**, 598-605.
4. M. Gholinejad and J. Ahmadi, *ChemPlusChem.*, 2015, **80**, 973-979.
5. A. Komaromi and Z. Novak, *Chem. Commun.*, 2008, **40**, 4968–4970.
6. K. Xu, S. Sun, G. Zhang, F. Yang and Y. Wu, *RSC Adv.*, 2014, **4**, 32643-32646.
7. D. Kang, D. Eom, H. Kim and P.- H. Lee, *Eur. J. Org. Chem.*, 2010, **2010**, 2330–

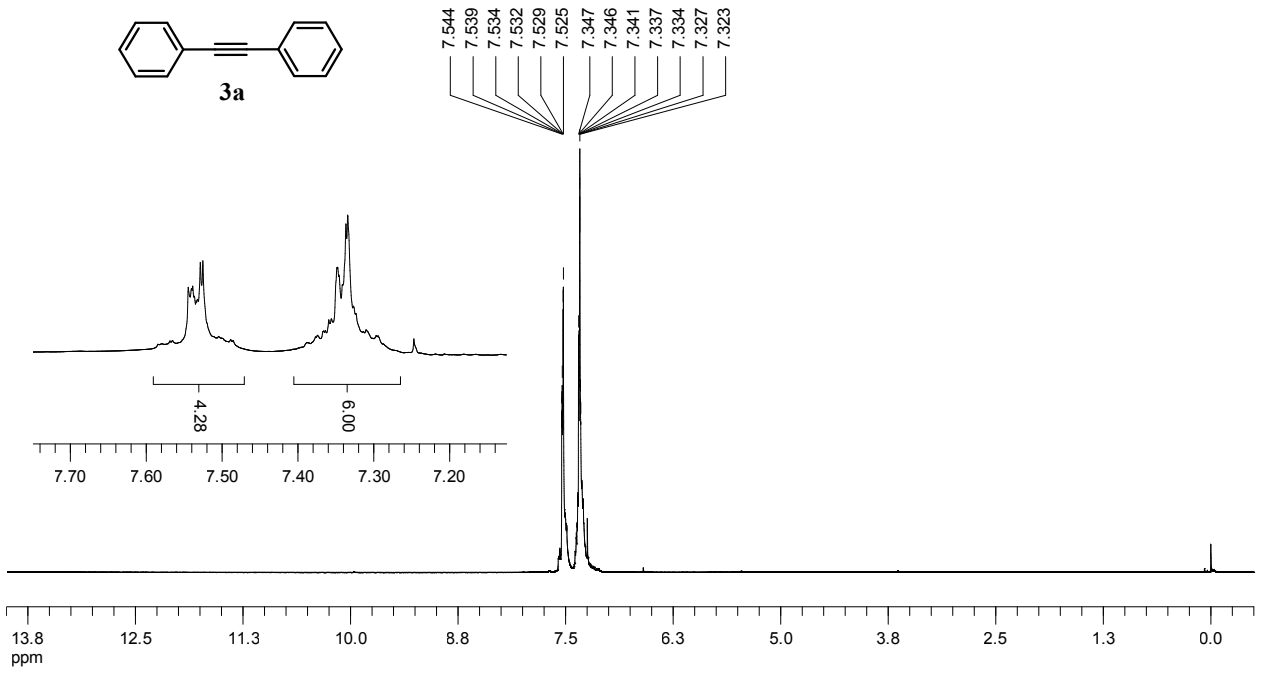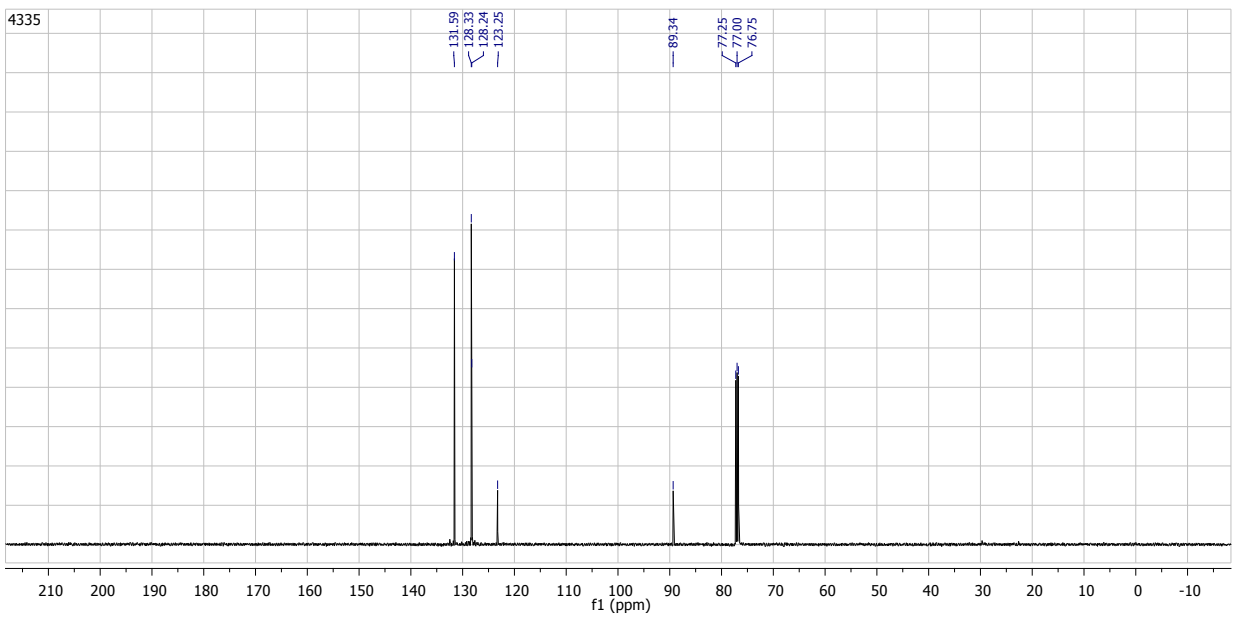

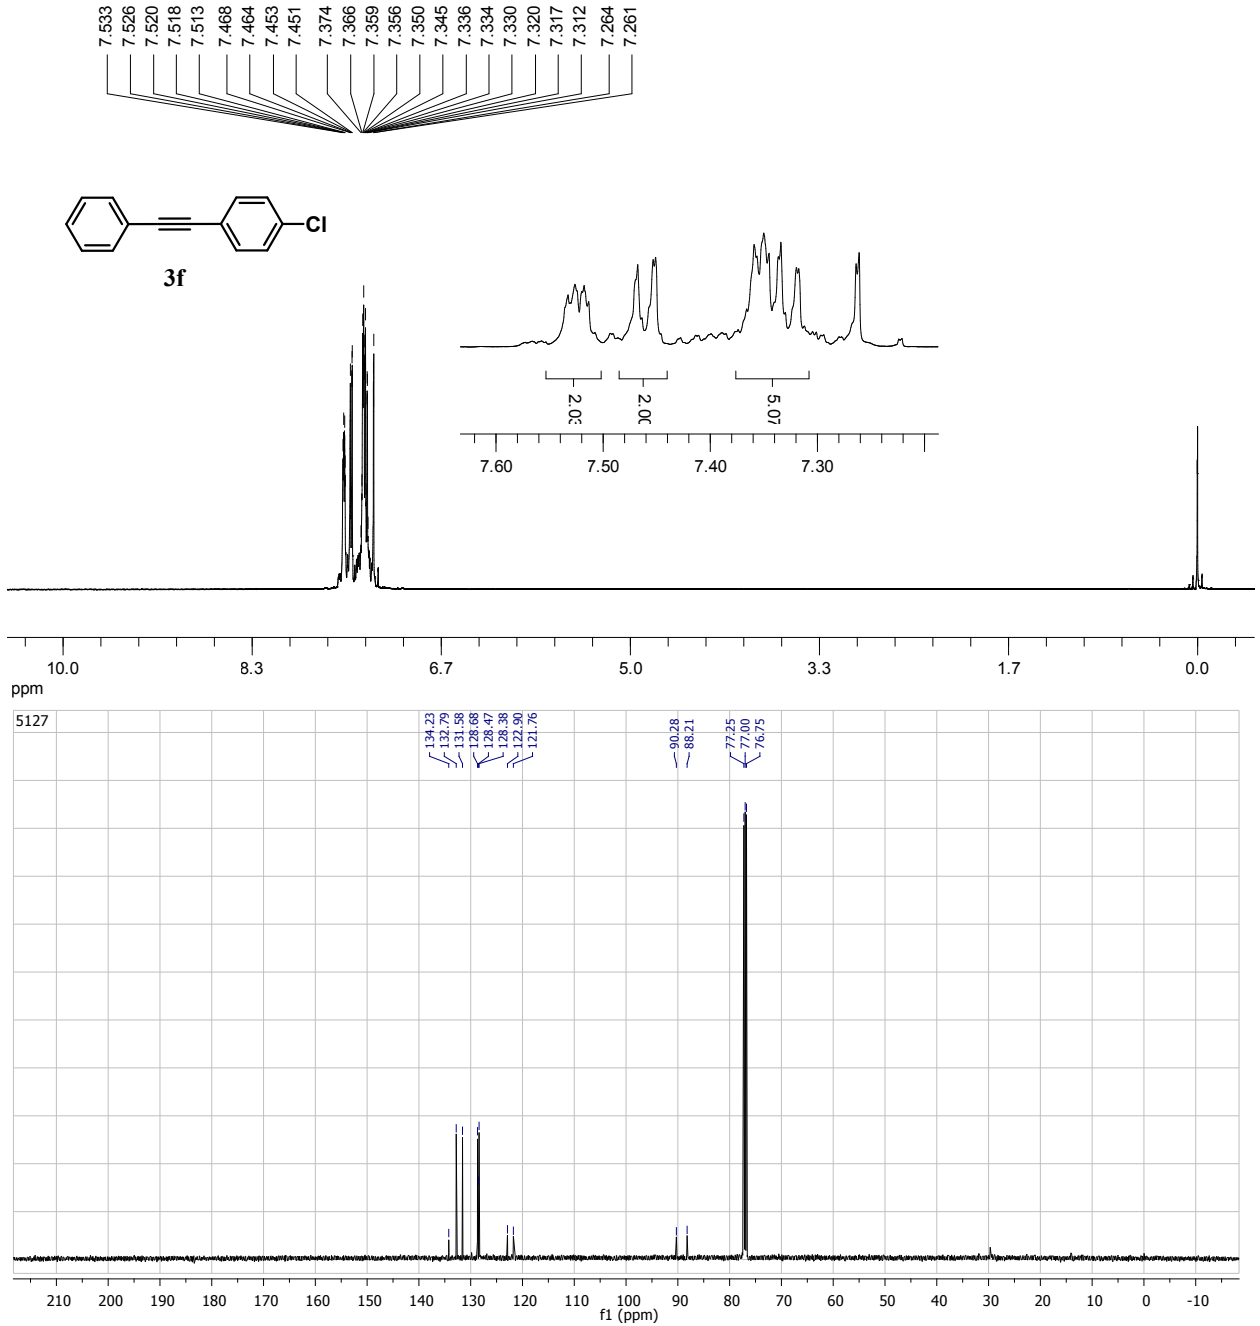

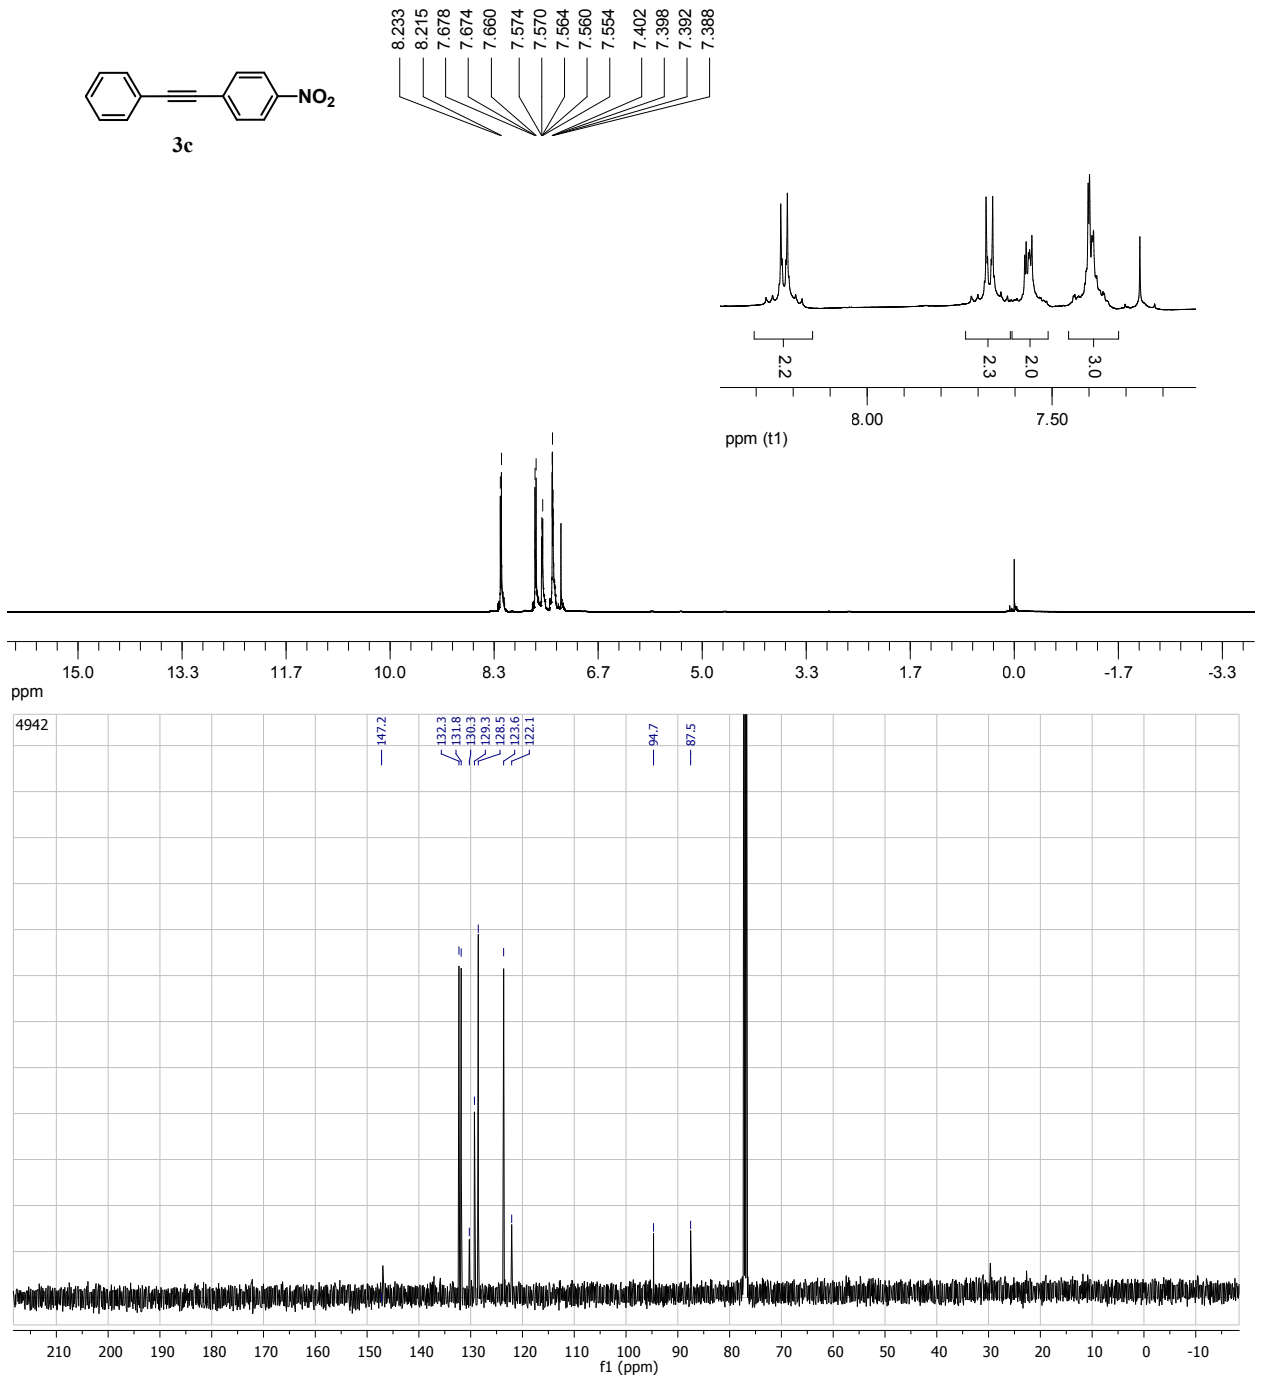



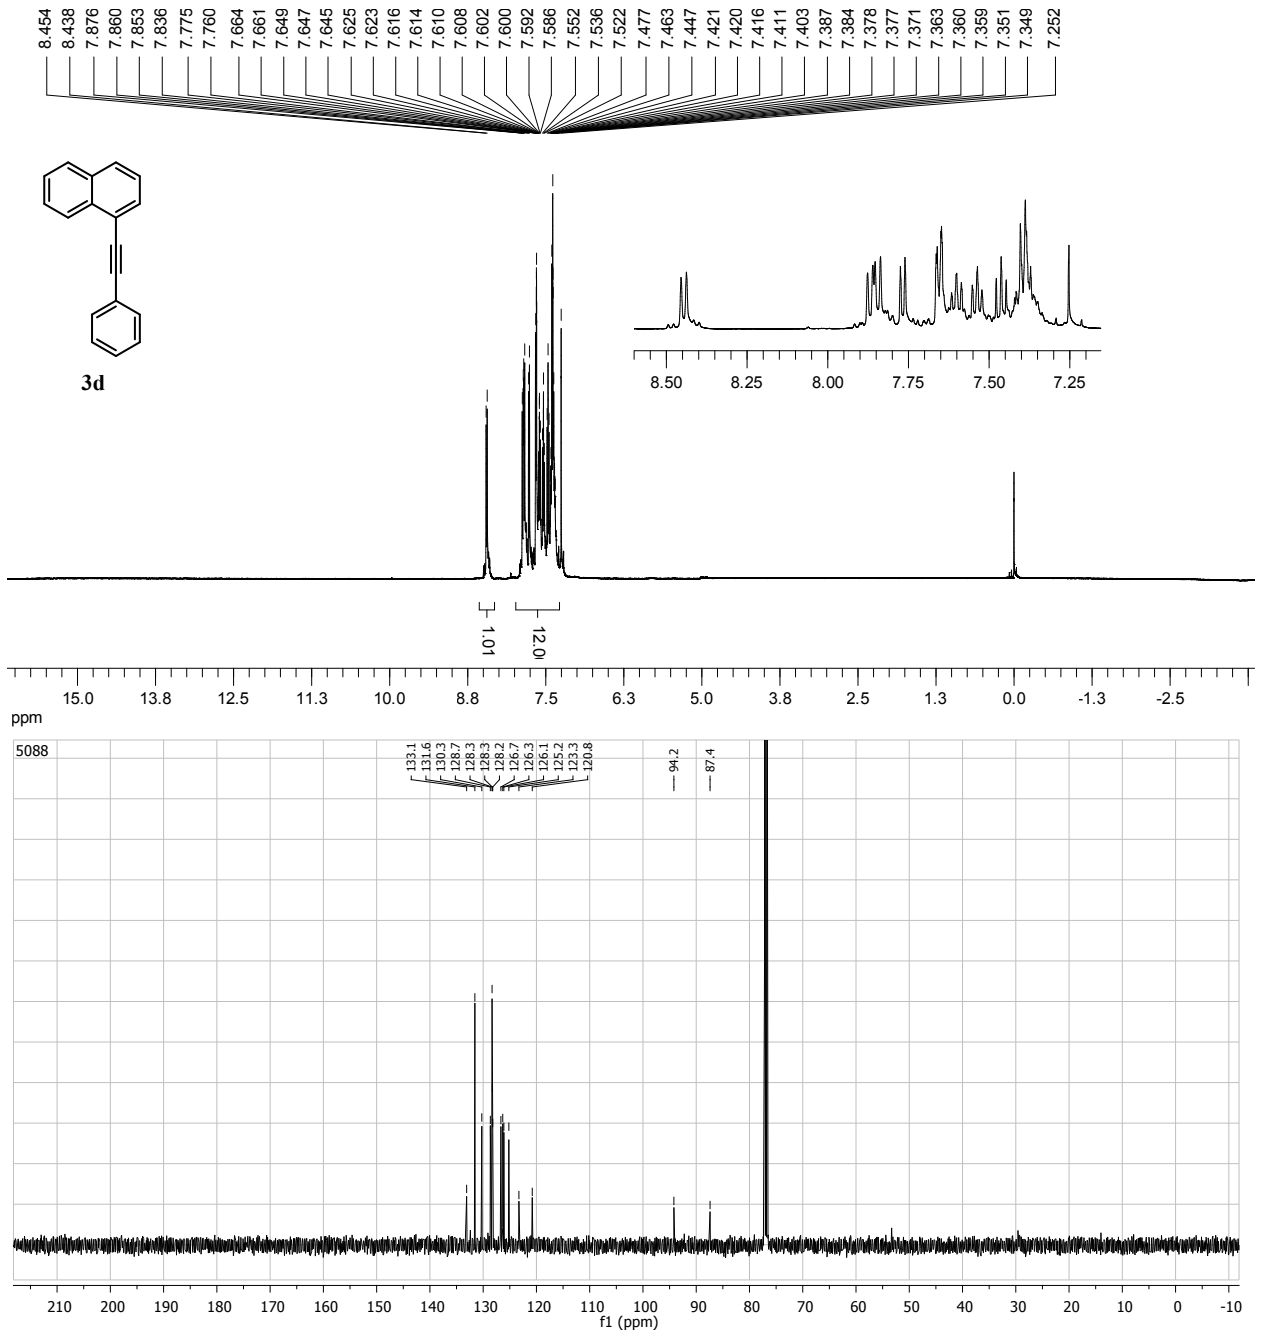

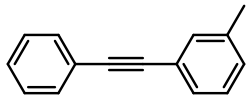

3g

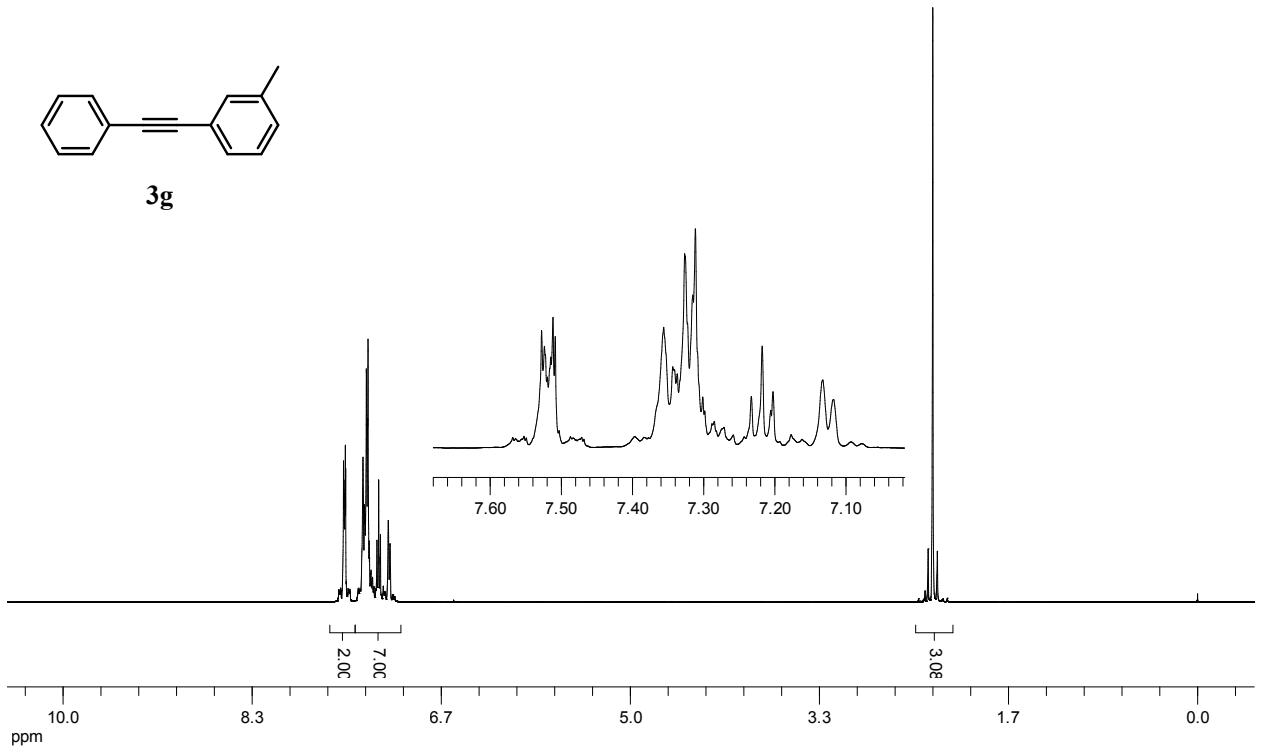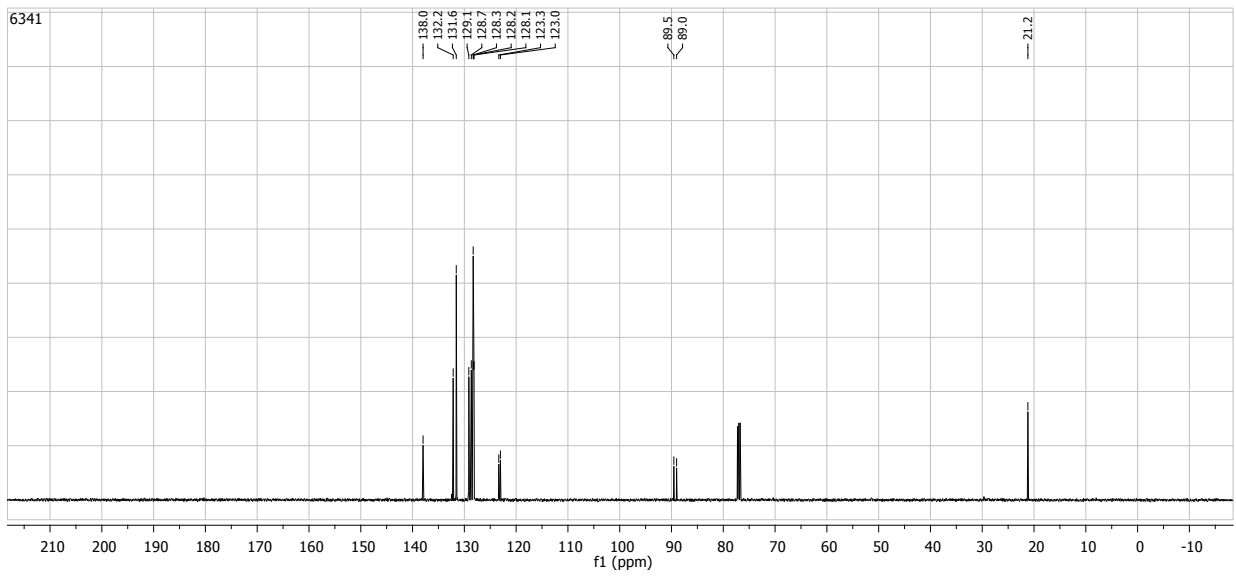

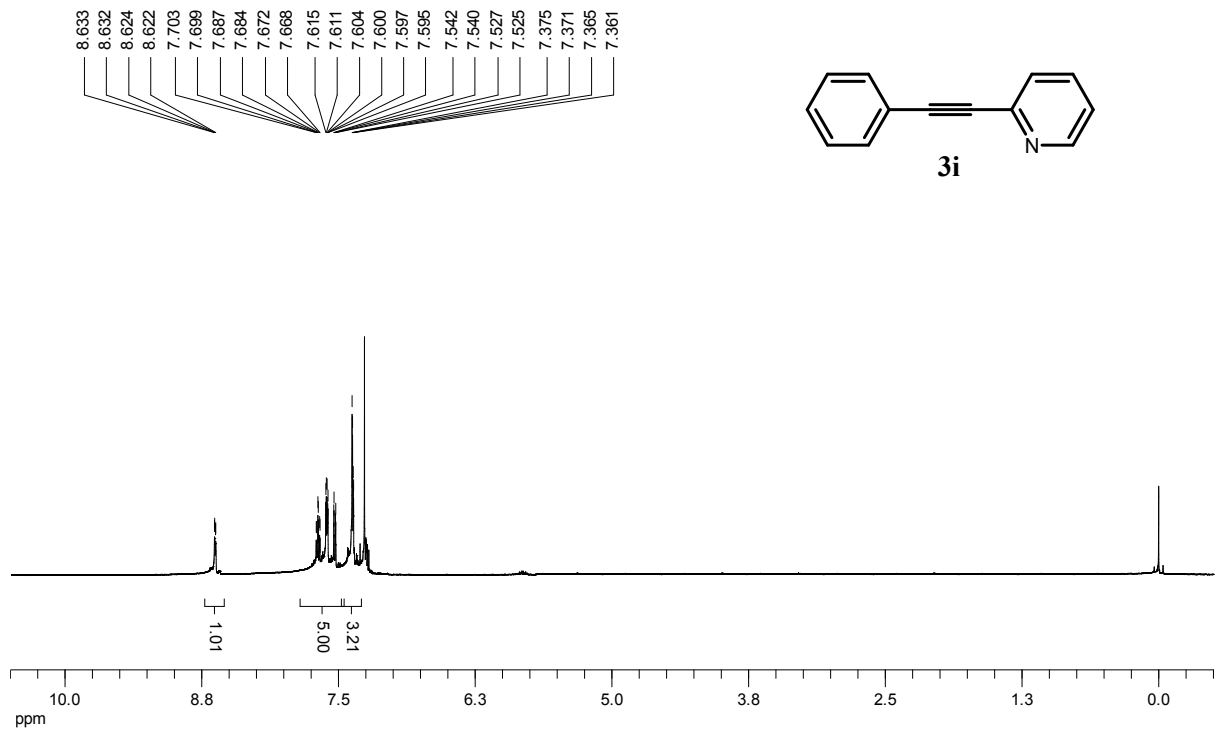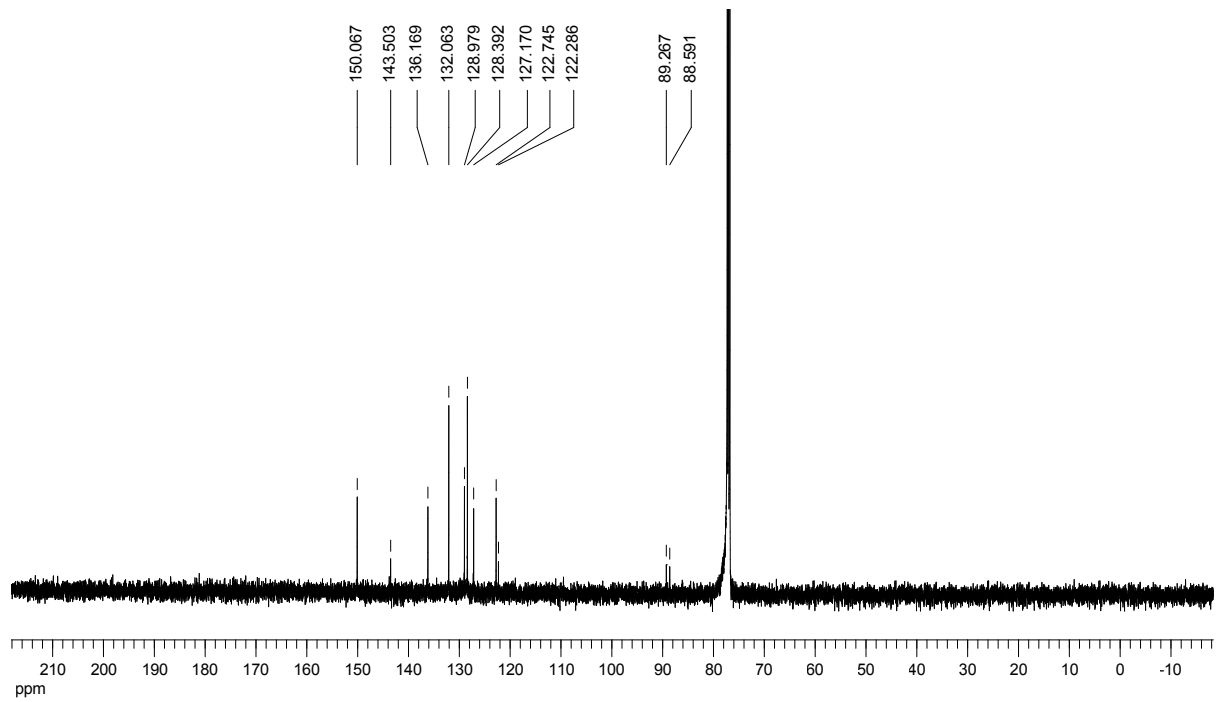

Supplement: c5ra22601e1.pdf [file c5ra22601e1.pdf]
